# Supplementary material
Source: Springer Nature journal article supplement (https://www.springermedizin.de/resource/supplementary/12986_2009_199_MOESM1_ESM.pdf/25655574)



Folate deficit  
( $<5.3$  nmol/l)  
OR = 5.140

OR=  
14.32

cHDL deficit  
( $<35$  mg/dl)  
OR = 2.786

OR=  
87.70

OR=  
31.48

OR=  
17.06

Genotype  
CC  $\rightarrow$  CT  
OR = 2.362

Supplement: MOESM1 [file 25655574]
